# Supplementary material for: Structure of an N276-Dependent HIV-1 Neutralizing Antibody Targeting a Rare V5 Glycan Hole Adjacent to the CD4 Binding Site
Source: PubMed Central journal article supplement (PMC5105658; doi:10.1128/jvi.01357-16), 2016-10-28
Supplement: JVI.01357-16_zjv999182096so1.pdf [file JVI.01357-16_zjv999182096so1.pdf]

Supplementary Figure 1: Design of a resurfaced antigen based on RSC3 to isolate early CD4bs antibodies from donor CAP257

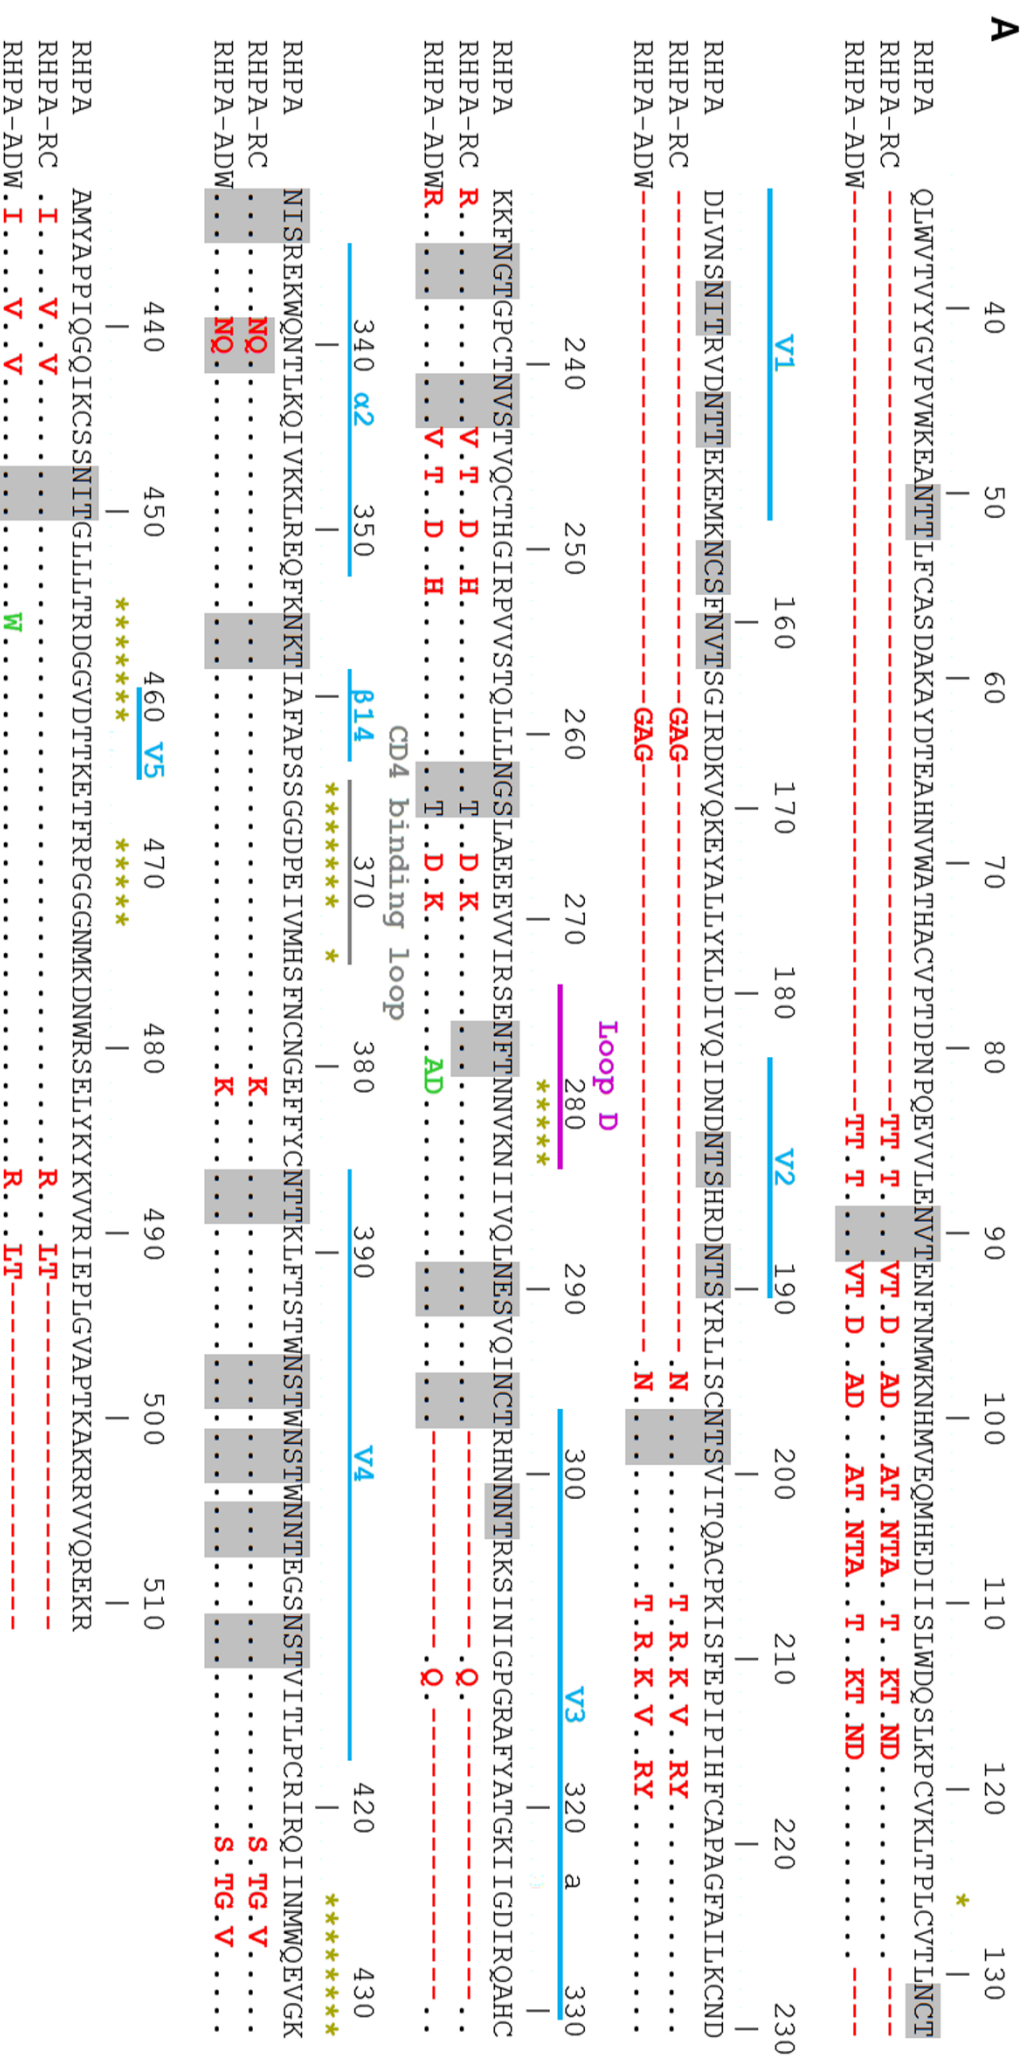

A) A sequence alignment of RHPA gp120, and the two newly designed sorting antigens RHPA-RC and RHPA-ADW. Truncations or resurfacing mutations are coloured red, potential N-linked glycosylation sequons are shaded grey, the hypervariable regions, loop D, and the CD4 binding loop are highlighted cyan, purple, and light grey respectively, and the CD4bs is indicated with yellow asterisks. The CAP257 escape mutations incorporated into the negative sorting antigen RHPA-ADW are coloured green.

Supplementary Figure 2: Potentially related immunoglobulin clusters isolated from donor CAP257 at 107 weeks post-infection

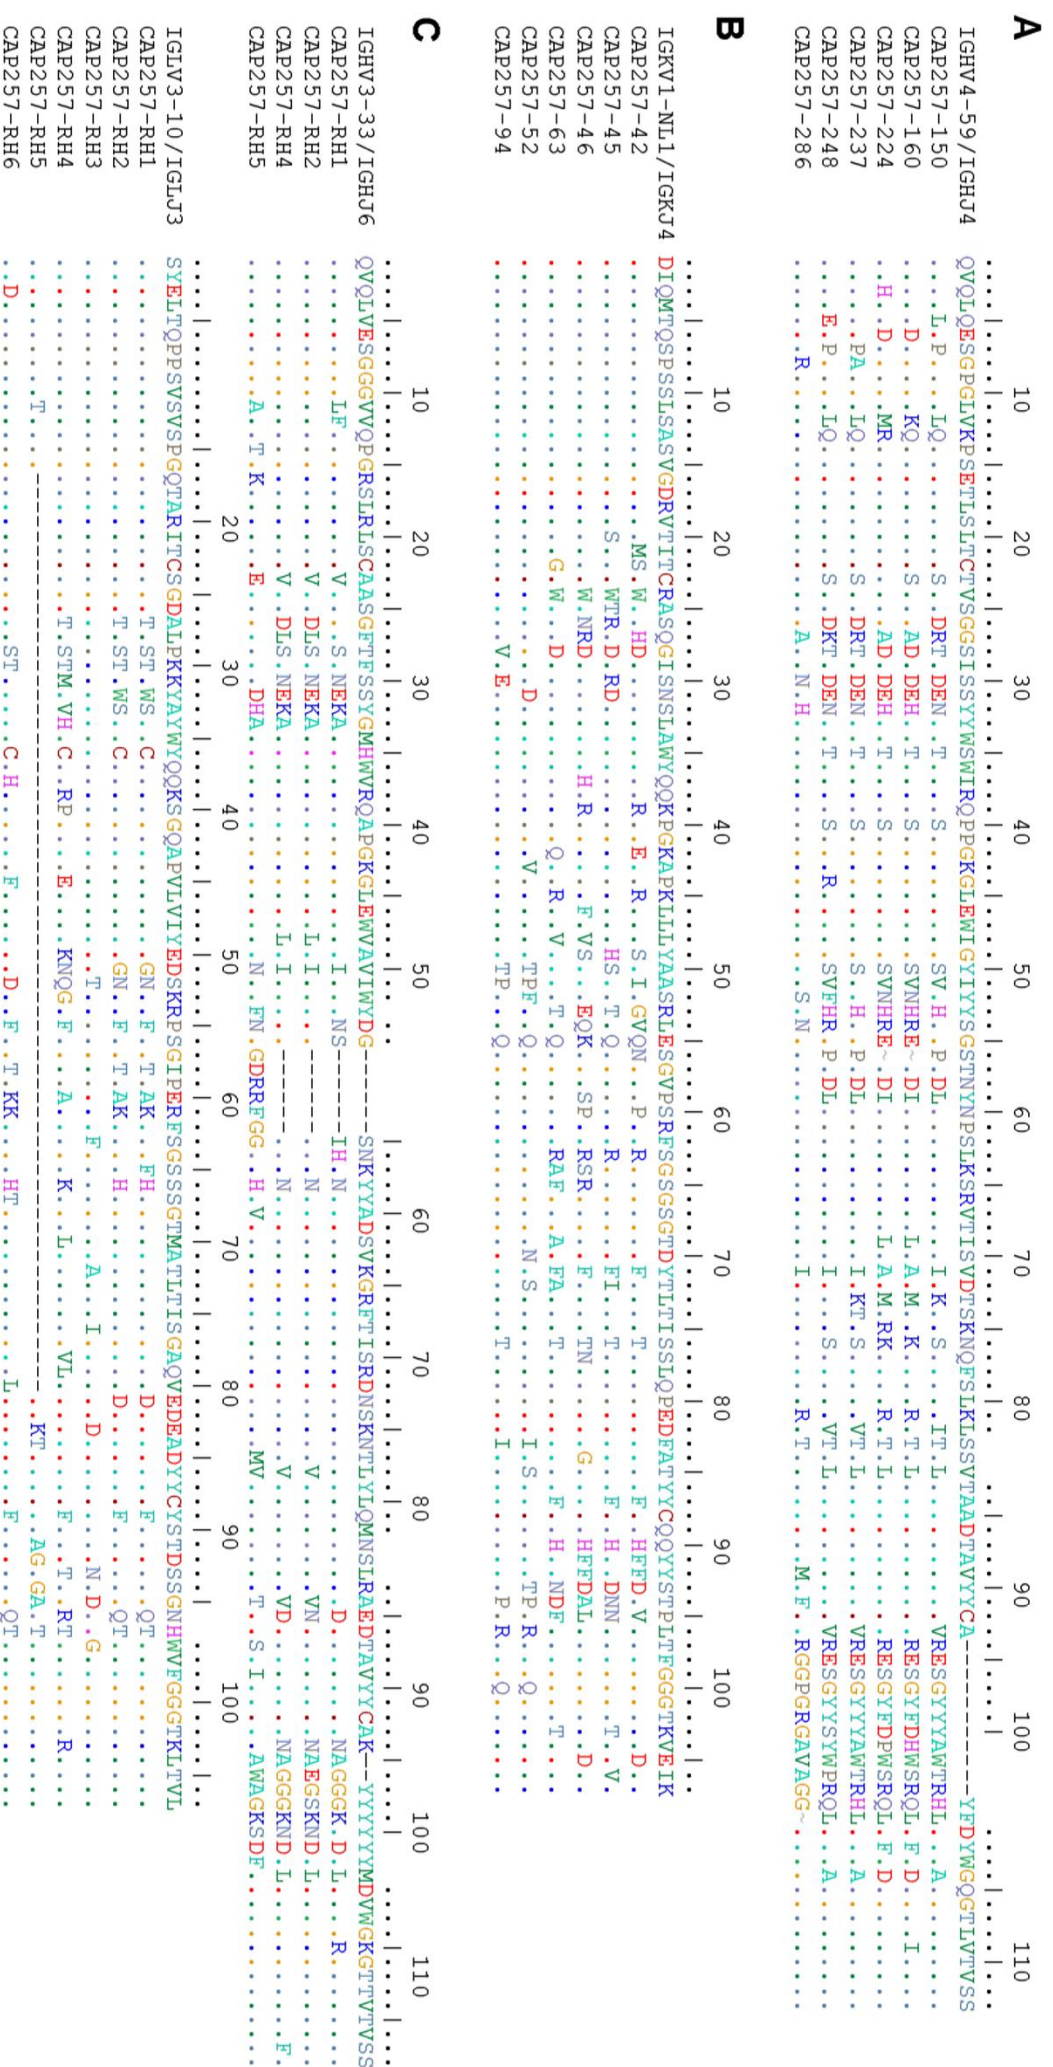

Sequence alignments of the three potentially related immunoglobulin clusters isolated as RHPA-RC+, RHPA-ADW- by flow cytometry from CAP257 PBMC memory B cells, numbered according to Kabat. A) Heavy chain alignment of the IGHV4-59 genes. B) Kappa chain alignment of the IGKV1-NL1 genes. C) Heavy and light chain alignments of the IGHV3-33 and IGLV3-10 genes.

### Supplementary Figure 3: Residue-by-residue contacts between RHPA gp120 and CAP257-RH1

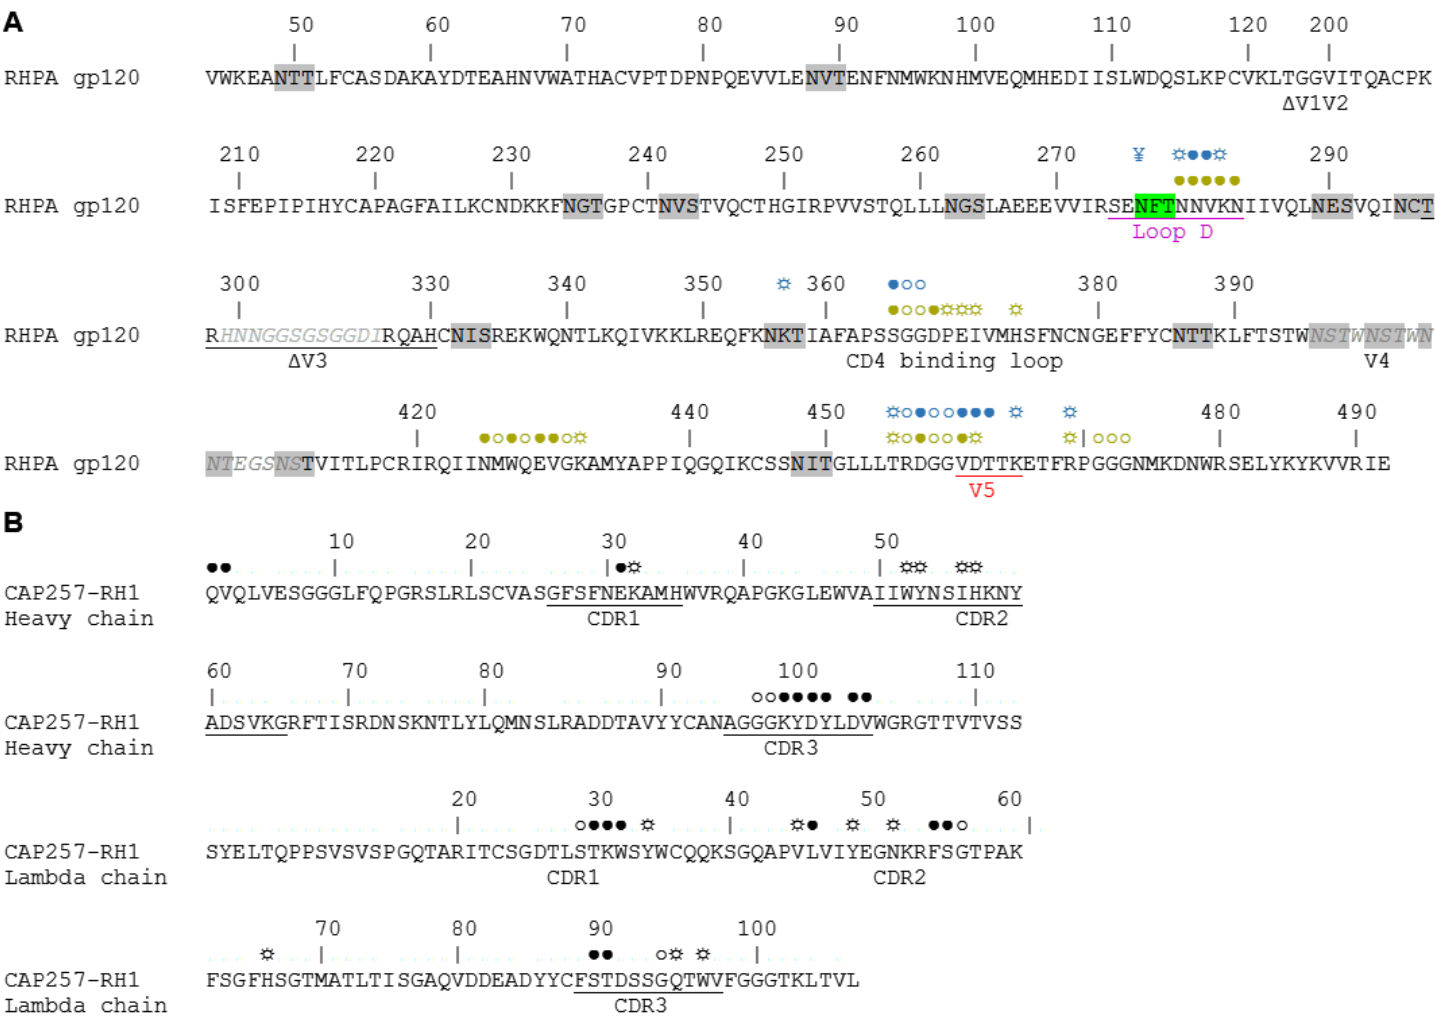

A) The RHPA gp120 sequence is shown, and numbered according to the HxB2 convention. Potential N-linked glycosylation sequons are shaded grey, disordered regions are indicated in italics, and loop D or V5 are indicate with purple and red underlines respectively. Contacts for the cocrystal complex are shown in blue, while previously determined interactions between CD4 and gp120 are shown in gold. Open circles (o) indicate main chain contacts only, ray circles (⊗) indicate side chain contacts only, closed circles (●) indicate both main chain and side chain contacts, and the ¥ symbol is used to specify glycan interactions. B) The heavy and light chain sequences for CAP257-RH1 are shown, the CDR loops are underlined, and contacts in the cocrystal complex are labelled as in A.

## Supplementary Figure 4: Autologous CAP257 V5 sequences

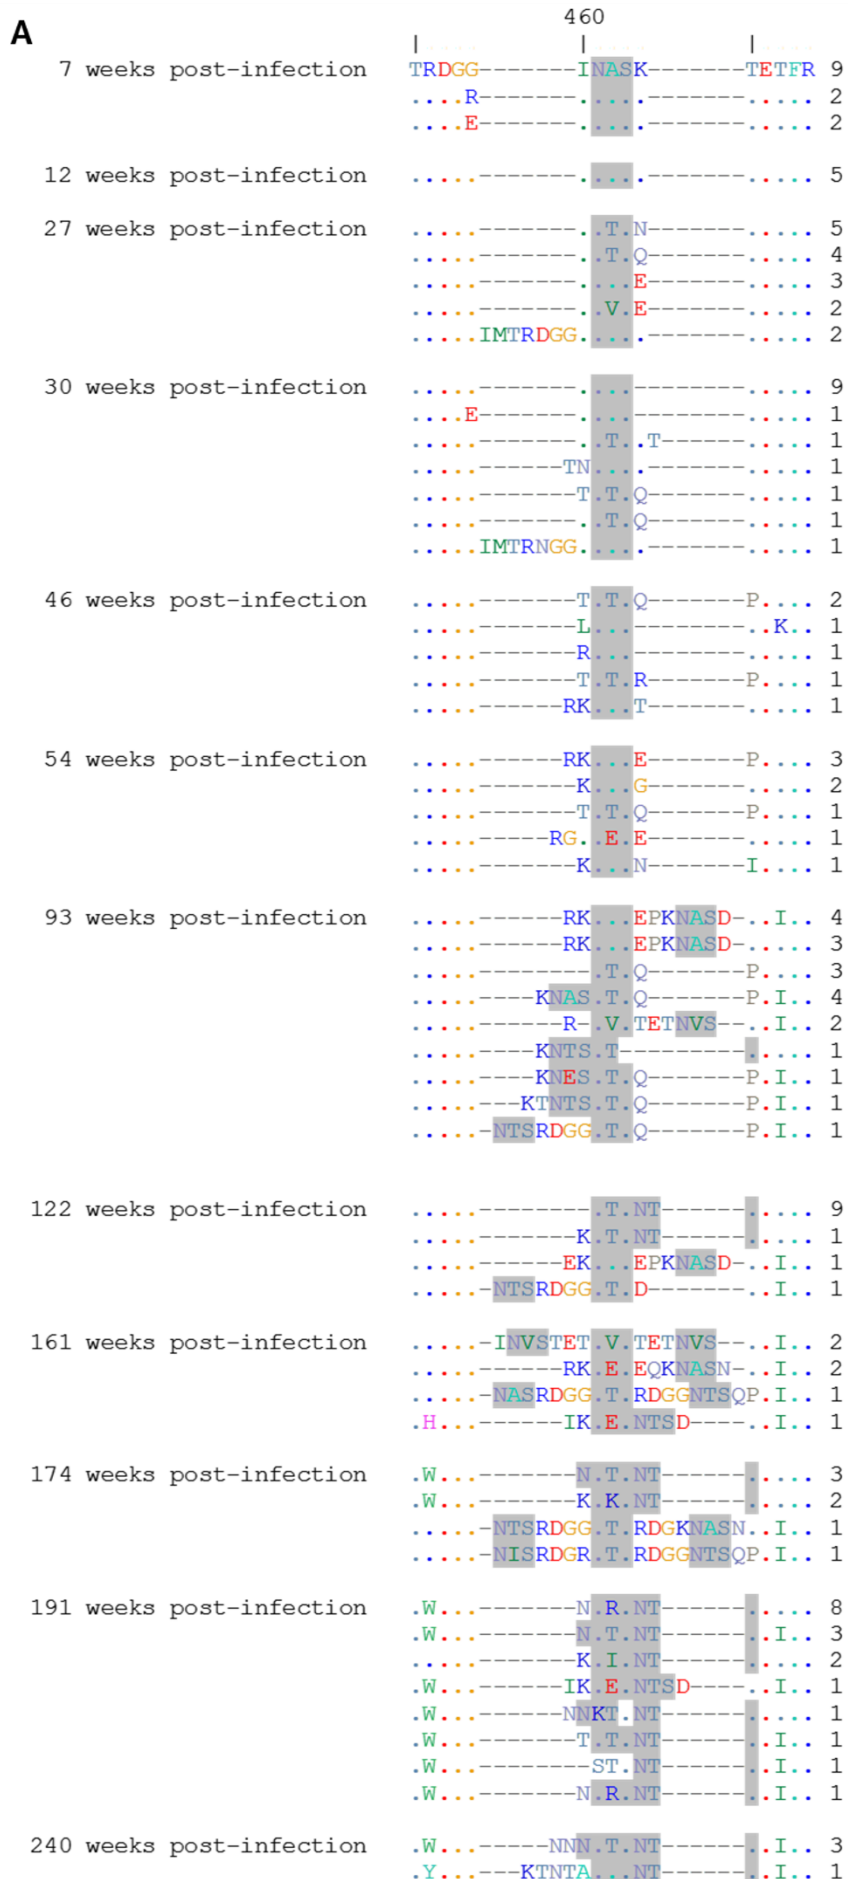

A) An alignment of CAP257 Env V5 (and flanking regions) sequences identified by SGA from 7 weeks to 240 weeks post-infection. Potential N-linked glycosylation sequons are shaded grey, and the number of identical sequences are listed on the right of the figure.

**Supplementary Table 1: Heterologous neutralization mediated by CAP257-RH1**

| Virus           | Clade | CAP257-RH1 | Virus     | Clade | CAP257-RH1 | Virus           | Clade | CAP257-RH1 | Virus            | Clade | CAP257-RH1 |
|-----------------|-------|------------|-----------|-------|------------|-----------------|-------|------------|------------------|-------|------------|
| 0260.v5.c36     | A     | >50        | TH976.17  | AE    | >50        | THRO.18         | B     | >50        | CNE7             | BC    | >50        |
| 0330.v4.c3      | A     | >50        | 235-47    | AG    | >50        | TRJO.58         | B     | >50        | 286.36           | C     | >50        |
| 0439.v5.c1      | A     | >50        | 242-14    | AG    | >50        | TRO.11          | B     | >50        | 288.38           | C     | >50        |
| 3365.v2.c20     | A     | >50        | 263-8     | AG    | >50        | WITO.33         | B     | >50        | DU422.01         | C     | >50        |
| 3415.v1.c1      | A     | >50        | 269-12    | AG    | >50        | X2278.C2.B1     | B     | >50        | MW965.26         | C     | >50        |
| 3718.v3.c11     | A     | >50        | 271-11    | AG    | >50        | YU2.DG          | B     | >50        | SO18.18          | C     | >50        |
| BB201.B42       | A     | >50        | 928-28    | AG    | >50        | BJOX002000.03.2 | BC    | >50        | TV1.29           | C     | >50        |
| BI369.9A        | A     | >50        | DJ263.8   | AG    | >50        | CH038.12        | BC    | >50        | TZA125.17        | C     | >50        |
| BS208.B1        | A     | >50        | T250-4    | AG    | >50        | CH070.1         | BC    | >50        | TZBD.02          | C     | >50        |
| KER2008.12      | A     | >50        | T251-18   | AG    | >50        | CH117.4         | BC    | >50        | ZAO12.29         | C     | >50        |
| KER2018.11      | A     | >50        | T253-11   | AG    | >50        | CH119.10        | BC    | >50        | ZM106.9          | C     | >50        |
| KNH1209.18      | A     | >50        | T255-34   | AG    | >50        | CH181.12        | BC    | >50        | ZM109.4          | C     | >50        |
| MB201.A1        | A     | >50        | T257-31   | AG    | >50        | CNE15           | BC    | >50        | ZM135.10a        | C     | >50        |
| MB539.2B7       | A     | >50        | T266-60   | AG    | >50        | CNE20           | BC    | >50        | ZM176.66         | C     | >50        |
| MI369.A5        | A     | >50        | T278-50   | AG    | >50        | CNE21           | BC    | >50        | ZM197.7          | C     | >50        |
| MS208.A1        | A     | >50        | T280-5    | AG    | >50        | CNE40           | BC    | >50        | ZM214.15         | C     | >50        |
| Q23.17          | A     | >50        | T33-7     | AG    | >50        | 0013095-2.11    | C     | >50        | ZM215.8          | C     | >50        |
| Q259.17         | A     | >50        | 3988.25   | B     | >50        | 001428-2.42     | C     | >50        | ZM233.6          | C     | >50        |
| Q769.d22        | A     | >50        | 5768.04   | B     | >50        | 0077_V1.C16     | C     | >50        | ZM249.1          | C     | >50        |
| Q769.h5         | A     | >50        | 6101.10   | B     | >50        | 00836-2.5       | C     | >50        | ZM53.12          | C     | >50        |
| Q842.d12        | A     | >50        | 6535.3    | B     | >50        | 0921.V2.C14     | C     | >50        | ZM55.28a         | C     | >50        |
| QH209.14M.A2    | A     | >50        | 7165.18   | B     | >50        | 16055-2.3       | C     | >50        | 3326.V4.C3       | CD    | >50        |
| RW020.2         | A     | >50        | 45_01dG5  | B     | >50        | 16845-2.22      | C     | >50        | 3337.V2.C6       | CD    | >50        |
| UG037.8         | A     | >50        | 89.6.DG   | B     | >50        | 16936-2.21      | C     | >50        | 3817.v2.c59      | CD    | >50        |
| 246-F3.C10.2    | AC    | >50        | AC10.29   | B     | >50        | 25710-2.43      | C     | >50        | 191821.E6.1      | D     | >50        |
| 3301.V1.C24     | AC    | >50        | ADA.DG    | B     | >50        | 25711-2.4       | C     | >50        | 231965.c1        | D     | >50        |
| 3589.V1.C4      | AC    | >50        | Bal.01    | B     | >50        | 25925-2.22      | C     | >50        | 247-23           | D     | >50        |
| 6540.v4.c1      | AC    | >50        | Bal.26    | B     | >50        | 26191-2.48      | C     | >50        | 3016.v5.c45      | D     | >50        |
| 6545.V4.C1      | AC    | >50        | BG1168.01 | B     | >50        | 3168.V4.C10     | C     | >50        | 57128.vrc15      | D     | >50        |
| 0815.V3.C3      | ACD   | >50        | BL01.DG   | B     | >50        | 3637.V5.C3      | C     | >50        | 6405.v4.c34      | D     | >50        |
| 6095.V1.C10     | ACD   | >50        | BR07.DG   | B     | >50        | 3873.V1.C24     | C     | >50        | A03349M1.vrc4a   | D     | >50        |
| 3468.V1.C12     | AD    | >50        | BX08.16   | B     | >50        | 6322.V4.C1      | C     | >50        | NKU3006.ec1      | D     | >50        |
| Q168.a2         | AD    | >50        | CAAN.A2   | B     | >50        | 6471.V1.C16     | C     | >50        | UG021.16         | D     | >50        |
| Q461.e2         | AD    | >50        | CNE10     | B     | >50        | 6631.V3.C10     | C     | >50        | UG024.2          | D     | >50        |
| 620345.c1       | AE    | >50        | CNE12     | B     | >50        | 6644.V2.C33     | C     | >50        | P0402.c2.11      | G     | >50        |
| BJOX009000.02.4 | AE    | >50        | CNE14     | B     | >50        | 6785.V5.C14     | C     | >50        | P1981.C5.3       | G     | >50        |
| BJOX010000.06.2 | AE    | >50        | CNE4      | B     | >50        | 6838.V1.C35     | C     | >50        | X1193.c1         | G     | >50        |
| BJOX025000.01.1 | AE    | >50        | CNE57     | B     | >50        | 96ZM651.02      | C     | >50        | X1254.c3         | G     | >50        |
| BJOX028000.10.3 | AE    | >50        | HO86.8    | B     | >50        | BR025.9         | C     | >50        | X1632.S2.B10     | G     | >50        |
| C1080.c3        | AE    | >50        | HT593.1   | B     | >50        | CAP210.E8       | C     | >50        | X2088.c9         | G     | >50        |
| C2101.c1        | AE    | >50        | HXB2.DG   | B     | >50        | CAP244.D3       | C     | >50        | SIVmac251.30.SG3 | NA    | >50        |
| C4118.09        | AE    | >50        | JRCSF.JB  | B     | >50        | CAP45.G3        | C     | >50        | SVA.MLV          | NA    | >50        |
| CNE3            | AE    | >50        | JRFL.JB   | B     | >50        | Ce1176.A3       | C     | >50        | Autologous TF:   |       |            |
| CNE5            | AE    | >50        | MN.3      | B     | >50        | CE703010217.B6  | C     | >50        | CAP257.2.00.Luc  | C     | >50        |
| CNE55           | AE    | >50        | PVO.04    | B     | >50        | CNE30           | C     | >50        |                  |       |            |
| CNE56           | AE    | >50        | QH0515.01 | B     | >50        | CNE31           | C     | >50        |                  |       |            |
| CNE59           | AE    | >50        | QH0692.42 | B     | >50        | CNE53           | C     | >50        |                  |       |            |
| CNE8            | AE    | >50        | REJO.67   | B     | >50        | CNE58           | C     | >50        |                  |       |            |
| M02138          | AE    | >50        | RHPA.7    | B     | 0.056      | DU123.06        | C     | >50        |                  |       |            |
| R1166.c1        | AE    | >50        | SC422.8   | B     | >50        | DU151.02        | C     | >50        |                  |       |            |
| R2184.c4        | AE    | >50        | SF162.LS  | B     | >50        | DU156.12        | C     | >50        |                  |       |            |
| TH966.8         | AE    | >50        | SS1196.01 | B     | >50        | DU172.17        | C     | >50        |                  |       |            |

Neutralization IC<sub>50</sub> values of CAP257-RH1 tested on a multi-clade 196 virus panel. Titres <50 µg/mL are highlighted in red.

**Supplementary Table 2: CAP257-RH1 interacting residues**

|                | CDR/<br>FWR | Interfacial<br>residue |      | Bond<br>type* | Accessible<br>Surface<br>Area (Å <sup>2</sup> ) | Buried<br>Surface<br>Area (Å <sup>2</sup> ) | Buried<br>Area<br>(%) | Δ <sup>i</sup> G |       |
|----------------|-------------|------------------------|------|---------------|-------------------------------------------------|---------------------------------------------|-----------------------|------------------|-------|
|                | FW1         | Gln                    | 1    | H             | 195.56                                          | 101.41                                      | 52                    | -0.99            |       |
|                | FW1         | Val                    | 2    |               | 53.59                                           | 16.66                                       | 31                    | 0.25             |       |
|                | H1          | Glu                    | 31   | S             | 116.00                                          | 67.94                                       | 59                    | -0.24            |       |
|                | H1          | Lys                    | 32   |               | 56.94                                           | 21.77                                       | 38                    | -0.72            |       |
| Heavy<br>chain | H2          | Trp                    | 52   |               | 33.50                                           | 9.12                                        | 27                    | 0.15             |       |
|                | H2          | Tyr                    | 52A  |               | 78.66                                           | 29.11                                       | 37                    | 0.14             |       |
|                | H2          | Ile                    | 55   |               | 130.19                                          | 48.30                                       | 37                    | 0.77             |       |
|                | H2          | His                    | 56   |               | 84.71                                           | 45.49                                       | 54                    | 0.58             |       |
|                | H3          | Gly                    | 97   |               | 19.05                                           | 11.21                                       | 59                    | 0.18             |       |
|                | H3          | Gly                    | 98   | H             | 11.81                                           | 11.81                                       | 100                   | -0.04            |       |
|                | H3          | Lys                    | 99   | HS            | 114.64                                          | 101.03                                      | 88                    | -1.06            |       |
|                | H3          | Tyr                    | 100  |               | 121.15                                          | 21.59                                       | 18                    | -0.12            |       |
|                | H3          | Asp                    | 100A | H             | 50.24                                           | 35.83                                       | 69                    | -0.42            |       |
|                | H3          | Tyr                    | 100B |               | 152.86                                          | 16.67                                       | 11                    | 0.07             |       |
|                | H3          | Asp                    | 101  | H             | 79.99                                           | 35.73                                       | 45                    | -0.43            |       |
|                | H3          | Val                    | 102  |               | 45.90                                           | 27.26                                       | 59                    | 0.44             |       |
|                |             | L1                     | Leu  | 28            |                                                 | 0.86                                        | 0.49                  | 57               | -0.01 |
|                |             | L1                     | Ser  | 29            |                                                 | 81.76                                       | 8.35                  | 10               | -0.10 |
|                | L1          | Thr                    | 30   | H             | 101.81                                          | 54.99                                       | 54                    | -0.27            |       |
|                | L1          | Lys                    | 31   | HS            | 51.09                                           | 37.28                                       | 73                    | -0.24            |       |
|                | L1          | Trp                    | 32   | H             | 110.50                                          | 64.92                                       | 59                    | 0.29             |       |
|                | L1          | Tyr                    | 34   |               | 41.75                                           | 20.81                                       | 50                    | -0.11            |       |
|                | FW2         | Val                    | 45   |               | 94.58                                           | 7.20                                        | 8                     | 0.12             |       |
|                | FW2         | Leu                    | 46   |               | 72.34                                           | 13.00                                       | 18                    | 0.17             |       |
| Light<br>chain | L2          | TYR                    | 49   |               | 48.56                                           | 2.40                                        | 5                     | -0.02            |       |
|                | L2          | Glu                    | 50   |               | 45.55                                           | 4.06                                        | 9                     | -0.07            |       |
|                | L2          | Lys                    | 53   |               | 92.87                                           | 2.01                                        | 2                     | 0.03             |       |
|                | L2          | Phe                    | 55   |               | 123.60                                          | 93.41                                       | 76                    | 1.46             |       |
|                | L2          | Ser                    | 56   |               | 99.40                                           | 36.86                                       | 37                    | -0.40            |       |
|                | L2          | GLY                    | 57   |               | 78.97                                           | 26.61                                       | 34                    | -0.19            |       |
|                | L2          | THR                    | 58   |               | 45.98                                           | 4.69                                        | 10                    | 0.07             |       |
|                |             | FW3                    | SER  | 56            |                                                 | 99.40                                       | 5.27                  | 5                | -0.06 |
|                | FW3         | Gly                    | 57   |               | 78.97                                           | 41.03                                       | 52                    | 0.17             |       |
|                | FW3         | His                    | 66   |               | 44.46                                           | 5.93                                        | 13                    | -0.11            |       |
|                | L3          | Ser                    | 90   |               | 1.58                                            | 1.41                                        | 89                    | 0.00             |       |
|                | L3          | Thr                    | 91   |               | 12.15                                           | 11.32                                       | 93                    | 0.07             |       |
|                | L3          | Gly                    | 95   |               | 36.71                                           | 2.51                                        | 7                     | 0.04             |       |
|                | L3          | Gln                    | 95A  |               | 152.59                                          | 1.17                                        | 1                     | -0.01            |       |
|                | L3          | Trp                    | 96   |               | 146.62                                          | 14.16                                       | 10                    | 0.23             |       |

FWR/CDR: Framework region or complementarity determining region of CAP257-RH1

\*H = hydrogen bond, S = salt bridge.

**Supplementary Table 3: RHPA gp120 interacting residues**

| gp120 region     | Heavy chain interfacial residue | Bond type* | Accessible Surface Area (Å <sup>2</sup> ) | Buried Surface Area (Å <sup>2</sup> ) | Buried Area (%) | Δ <sup>i</sup> G |
|------------------|---------------------------------|------------|-------------------------------------------|---------------------------------------|-----------------|------------------|
| Loop D           | Asn 279                         |            | 49.58                                     | 22.05                                 | 45              | -0.32            |
|                  | Asn 280                         | H          | 65.64                                     | 59.08                                 | 90              | -0.54            |
|                  | Val 281                         |            | 109.40                                    | 90.06                                 | 82              | 1.29             |
|                  | Lys 282                         | S          | 74.56                                     | 21.08                                 | 28              | 0.15             |
| CD4 binding loop | Ser 365                         |            | 84.29                                     | 35.03                                 | 42              | 0.26             |
|                  | Gly 366                         |            | 57.60                                     | 18.67                                 | 32              | 0.27             |
|                  | Gly 367                         |            | 57.76                                     | 27.64                                 | 48              | 0.20             |
| β23              | Thr 455                         |            | 37.68                                     | 10.12                                 | 27              | 0.14             |
|                  | Arg 456                         | H          | 32.60                                     | 5.40                                  | 17              | -0.06            |
|                  | Asp 457                         | HS         | 47.32                                     | 18.39                                 | 39              | 0.05             |
|                  | Gly 458                         |            | 22.15                                     | 5.58                                  | 25              | 0.04             |
|                  | Gly 459                         |            | 73.12                                     | 41.61                                 | 57              | 0.05             |
| V5               | Val 460                         |            | 142.69                                    | 18.09                                 | 13              | 0.29             |
| β24              | Arg 469                         |            | 72.39                                     | 3.78                                  | 5               | -0.04            |
| Glycans          | NAG1276                         |            | 356.83                                    | 15.12                                 | 4               | -0.28            |
|                  | NAG1277                         |            | 358.67                                    | 2.33                                  | 1               | -0.03            |
|                  | BMA1278                         |            | 288.06                                    | 24.26                                 | 8               | -0.30            |
|                  | MAN1279                         | H          | 289.89                                    | 49.60                                 | 17              | -0.60            |
|                  | MAN1280                         |            | 289.41                                    | 14.44                                 | 5               | 0.32             |
|                  | MAN1281                         | H          | 287.38                                    | 97.23                                 | 34              | -0.93            |
| gp120 region     | Light chain interfacial residue | Bond type* | Accessible Surface Area (Å <sup>2</sup> ) | Buried Surface Area (Å <sup>2</sup> ) | Buried area (%) | Δ <sup>i</sup> G |
| Loop E           | Lys 354                         |            | 190.51                                    | 2.50                                  | 1               | -0.09            |
|                  | Lys 357                         |            | 68.78                                     | 8.09                                  | 12              | -0.30            |
| V5               | Gly 459                         |            | 73.12                                     | 10.59                                 | 15              | -0.06            |
|                  | Val 460                         | H          | 142.69                                    | 124.60                                | 87              | 1.67             |
|                  | Asp 461                         | HS         | 69.27                                     | 37.80                                 | 55              | -0.39            |
|                  | Thr 462                         | H          | 121.42                                    | 96.85                                 | 80              | 0.79             |
|                  | Thr 463                         |            | 77.41                                     | 0.73                                  | 1               | -0.01            |
|                  | Lys 465                         |            | 128.91                                    | 14.75                                 | 11              | 0.15             |
| β24              | Arg 469                         |            | 72.39                                     | 1.02                                  | 1               | -0.04            |
| Glycans          | NAG1277                         |            | 358.67                                    | 43.42                                 | 12              | -0.65            |
|                  | BMA1278                         |            | 288.06                                    | 16.07                                 | 6               | -0.40            |
|                  | MAN1280                         |            | 289.41                                    | 73.16                                 | 25              | -1.17            |
|                  | MAN1281                         |            | 287.38                                    | 60.33                                 | 21              | -0.16            |
|                  | MAN1282                         |            | 290.50                                    | 45.77                                 | 16              | -0.57            |

\*H = hydrogen bond, S = salt bridge.

**Supplementary Table 4: List of hydrogen bonds and salt bridges****Hydrogen bonds**

---

| <b>gp120 residue</b> | <b>Distance (Å)</b> | <b>Heavy chain residue</b> |
|----------------------|---------------------|----------------------------|
| ASN 280[HD21]        | 2.39                | ASP 100A[ OD2]             |
| ASN 280[ OD1]        | 2.48                | GLY 102 [ H ]              |
| ARG 456[ O ]         | 1.81                | LYS 99 [ HZ1]              |
| ASP 457[ OD1]        | 2.40                | LYS 99 [ HZ2]              |
| MAN1279[ O5 ]        | 2.28                | GLN 1 [HE21]               |
| MAN1281[ O6 ]        | 2.40                | ASP 108 [ OD2]             |
| <b>gp120 residue</b> | <b>Distance (Å)</b> | <b>Light chain residue</b> |
| VAL 460[ O ]         | 2.13                | TRP 32[ H ]                |
| ASP 461[ OD1]        | 2.16                | LYS 31[ HZ3]               |
| THR 462[ H ]         | 2.34                | THR 30[ O ]                |

**Salt bridges**

---

| <b>gp120 residue</b> | <b>Distance (Å)</b> | <b>Heavy chain residue</b> |
|----------------------|---------------------|----------------------------|
| LYS 282[ NZ ]        | 3.58                | GLU 31[ OE2]               |
| ASP 457[ OD1]        | 3.20                | LYS 99[ NZ ]               |
| <b>gp120 residue</b> | <b>Distance (Å)</b> | <b>Light chain residue</b> |
| ASP 461[ OD1]        | 3.04                | LYS 31[ NZ ]               |



**Supplementary Table 5: Frequency of glycosylation at position N276 and in the V5 loop of a multi-clade 196 virus panel**

| Virus           |   | N276      | V5 Sequence |   | Virus     |                 | N276 | V5 Sequence            |                  | Virus |           | N276 | V5 Sequence |  |
|-----------------|---|-----------|-------------|---|-----------|-----------------|------|------------------------|------------------|-------|-----------|------|-------------|--|
| 0260.v5.c36     | Y | DNNNTT    | TH976.17    | Y | ANNKAS    | THRO.18         | Y    | SDGGSKSNKLELGT         | CNE7             | N     | INGTNT    |      |             |  |
| 0330.v4.c3      | Y | NNNNGANGN | 235-47      | Y | GNISSAN   | TRJO.58         | Y    | KTAVNNT                | 288.36           | Y     | LINDT     |      |             |  |
| 0439.v5.c1      | Y | NNAVTN    | 242-14      | Y | FRNDITETV | TRO.11          | Y    | NNNNSGP                | 288.38           | Y     | TNNTNNT   |      |             |  |
| 3365.v2.c20     | Y | NNNNSSN   | 263-8       | Y | INNSTS    | WITO.33         | Y    | SNSSQN                 | DU422.01         | Y     | ENSTJ     |      |             |  |
| 3415.v1.c1      | Y | ENNST     | 269-12      | Y | LINDSTN   | X2278.C2.B1     | Y    | ENNGT                  | MW965.26         | Y     | ENNRT     |      |             |  |
| 3718.v3.c11     | Y | ENET      | 271-11      | Y | NNNNVAT   | YU2.DG          | Y    | KDITNGT                | SO18.18          | Y     | HNSTN     |      |             |  |
| BB201.B42       | Y | NNNGTS    | 928-28      | Y | NNGTVADT  | BJOX002000.03.2 | Y    | PENDT                  | TV1.29           | Y     | FINTNNT   |      |             |  |
| BI389.9A        | Y | GNNNTN    | DJ283.8     | N | SNNSTN    | CH038.12        | Y    | RSNENDT                | TZA125.17        | Y     | NNTNGT    |      |             |  |
| BS208.B1        | Y | YNNVTN    | T250-4      | N | NSITN     | CH070.1         | Y    | NINRTN                 | TZBD.02          | Y     | GESNET    |      |             |  |
| KER2008.12      | Y | NSITVN    | T251-18     | Y | NNGSKAN   | CH117.4         | Y    | RDINVT                 | ZM012.29         | Y     | EDIKTE    |      |             |  |
| KER2018.11      | Y | NTGNNSRTN | T253-11     | Y | ANSSSTN   | CH119.10        | Y    | TESNNTENVT             | ZM106.9          | Y     | NGDITDIT  |      |             |  |
| KNH1209.18      | Y | NGNSTN    | T255-34     | Y | NNNSMN    | CH181.12        | Y    | ETNQTNET               | ZM109.4          | Y     | NNNNSTJ   |      |             |  |
| MB201.A1        | Y | NNNGTS    | T257-31     | Y | DSVNDTNGN | CNE15           | Y    | NEDKNT                 | ZM135.10a        | Y     | LNKNGEY   |      |             |  |
| MB539.2B7       | Y | NDNSNTJEN | T266-60     | Y | VNNDITNT  | CNE20           | Y    | TESNDT                 | ZM176.66         | Y     | INDNDT    |      |             |  |
| MI389.A5        | Y | GNNVTN    | T278-50     | Y | GDEKAN    | CNE21           | Y    | MTNENKKT               | ZM197.7          | Y     | NKSGAI    |      |             |  |
| MS208.A1        | Y | PNTTN     | T280-5      | N | NNSGSN    | CNE40           | Y    | KEANGT                 | ZM214.15         | Y     | NGNDITDIT |      |             |  |
| Q23.17          | Y | KDNVAV    | T33-7       | Y | NNNVAV    | 0013095.2-11    | Y    | NGNDTKT                | ZM215.8          | Y     | TNNTN     |      |             |  |
| Q259.17         | Y | KDSNIT    | 3988.25     | Y | NNNNNTTT  | 001428-2.42     | Y    | KNNT                   | ZM233.6          | Y     | ENSSST    |      |             |  |
| Q769.d22        | Y | INNSTE    | 5768.04     | Y | GSNNSSTSE | 0077.V1.C16     | Y    | ETNDGNTLELGTIKFSNLELET | ZM249.1          | Y     | SKNNTJ    |      |             |  |
| Q769.h5         | Y | INSTDITD  | 6101.1      | Y | DNNTTI    | 00836-2.5       | N    | NHEEANT                | ZM53.12          | Y     | LTNESK    |      |             |  |
| Q842.d12        | Y | NENSTR    | 6535.3      | Y | NETNVT    | 0921.V2.C14     | Y    | NGGADNST               | ZM55.28a         | Y     | ENTDNGT   |      |             |  |
| QH209.14M.A2    | Y | DDENNT    | 7165.18     | Y | ENRTDNGT  | 16055-2.3       | Y    | VESENT                 | 3326.V4.C3       | Y     | NSH       |      |             |  |
| RW020.2         | Y | NNSNTN    | 45.01665    | N | SSNTGT    | 16845-2.22      | Y    | NSNDNNEP               | 3337.V2.C6       | Y     | NTSE      |      |             |  |
| UG037.8         | Y | GNINES    | 89.6.DG     | Y | NSTELET   | 16936-2.21      | Y    | PDVVT                  | 3817.v2.c59      | Y     | LNTSNL    |      |             |  |
| 246-F3.C10.2    | Y | NTNSTK    | AC10.29     | Y | RGNDITDQT | 25710-2.43      | Y    | TGSESKKT               | 191821.E6.1      | Y     | INNTSSS   |      |             |  |
| 3301.V1.C24     | Y | SDGNSTK   | ADA.DG      | Y | TNSSGS    | 25711-2.4       | Y    | RGEELKNDT              | 231965.c1        | Y     | RDNSSSN   |      |             |  |
| 3589.V1.C4      | Y | GNNSSN    | Bal.01      | Y | PEDKKT    | 25925-2.22      | Y    | TGJNSST                | 247-23           | N     | SWNTEET   |      |             |  |
| 6540.v4.c1      | N | NNNSDN    | Bal.26      | Y | PEDDKT    | 26191-2.48      | Y    | NSNSTE                 | 3016.v5.c45      | Y     | NTSDDH    |      |             |  |
| 6545.V4.C1      | N | NRSSDN    | BG1168.01   | Y | DTNNGT    | 3168.V4.C10     | Y    | GKNNET                 | 57128.vrc15      | Y     | GADNRRON  |      |             |  |
| 0815.V3.C3      | Y | SNTVAS    | BL01.DG     | Y | KNTEET    | 3637.V5.C3      | Y    | ISNGTDKKN              | 6405.v4.c34      | Y     | GADNSHN   |      |             |  |
| 6095.V1.C10     | Y | VNDSQS    | BR07.DG     | Y | NTSSJA    | 3873.V1.C24     | Y    | TGKRDJENAT             | A03349M1.vrc4a   | Y     | GNSSSN    |      |             |  |
| 3468.V1.C12     | Y | DTSSMN    | BX08.16     | Y | SDSSSSGK  | 6322.V4.C1      | Y    | KDNMKT                 | NKU3006.ec1      | Y     | VKNSTN    |      |             |  |
| Q168.a2         | Y | NNNSTN    | CAAN.A2     | Y | NDETNGT   | 6471.V1.C16     | N    | PNSNDT                 | UG021.16         | Y     | NTNSTN    |      |             |  |
| Q461.e2         | Y | GENDT     | CNE10       | Y | NESTTET   | 6631.V3.C10     | Y    | KTSNNT                 | UG024.2          | Y     | VKNSTN    |      |             |  |
| 620345.c1       | N | GGPTADN   | CNE12       | Y | KNESNT    | 6644.V2.C33     | Y    | SINGSEDNNT             | P0402.c2.11      | Y     | GNNTEET   |      |             |  |
| BJOX009000.02.4 | Y | DIKMSN    | CNE14       | Y | DNENTT    | 6785.V5.C14     | Y    | SINSEEDNT              | P1981.C5.3       | Y     | NTNGT     |      |             |  |
| BJOX010000.06.2 | Y | NISATN    | CNE4        | Y | HMSNGSNET | 6838.V1.C35     | Y    | NGTENN                 | X1193.c1         | Y     | KSNTENGT  |      |             |  |
| BJOX025000.01.1 | N | NNTTS     | CNE57       | Y | NNTDKKT   | 96ZM651.02      | Y    | STNDTNNNT              | X1254.c3         | Y     | TNNTNT    |      |             |  |
| BJOX028000.10.3 | Y | DDVGT     | HO86.8      | Y | KNNKST    | BR025.9         | Y    | TGMHDT                 | X1632.S2.B10     | Y     | TNKDTNEA  |      |             |  |
| C1080.c3        | Y | DAVATNDT  | HT593.1     | Y | NNNKTNGT  | CAP210.E8       | Y    | ENKJENNDT              | X2088.c9         | Y     | NDTHDKEN  |      |             |  |
| C2101.c1        | Y | NNNTN     | HXB2.DG     | Y | NSNWES    | CAP244.D3       | Y    | EAMGTNMI               | SIVmac251.30.SG3 | N/A   | -         |      |             |  |
| C4118.09        | Y | TNNTNSS   | JRCST.JB    | Y | KNESEI    | CAP45.G3        | Y    | KTDRNDT                | SVA.MLV          | N/A   | -         |      |             |  |
| CNE3            | N | NNSNAN    | JRFLJB      | Y | INENGT    | Ca1176.A3       | Y    | INQJGE                 | Autologous T/F:  |       |           |      |             |  |
| CNE5            | Y | NNNSTGN   | MN.3        | Y | EDITDNDT  | CE703010217.B6  | Y    | NNKSTP                 | CAP257.2.00.Luc  | Y     | IMASK     |      |             |  |
| CNE55           | Y | GNNRSN    | PVO.04      | Y | ANNTN     | CNE30           | Y    | TNNTNNT                |                  |       |           |      |             |  |
| CNE56           | Y | DNTTDS    | QH0515.01   | Y | TNGTNET   | CNE31           | Y    | KTNKTE                 |                  |       |           |      |             |  |
| CNE59           | Y | NNMNTN    | QH0692.42   | Y | VNGTR     | CNE53           | Y    | SQPNNT                 |                  |       |           |      |             |  |
| CNE8            | Y | TNMSN     | REJO.67     | Y | NSSLSSP   | CNE58           | Y    | TNMATT                 |                  |       |           |      |             |  |
| M02138          | Y | INRTYN    | RHPA.7      | Y | VDITK     | DU123.06        | Y    | NTSNTP                 |                  |       |           |      |             |  |
| R1166.c1        | Y | VANSTN    | SC422.8     | Y | NNNSTT    | DU151.02        | Y    | KNTTN                  |                  |       |           |      |             |  |
| R2184.c4        | Y | TNTSKN    | SF162.LS    | Y | KEISNT    | DU156.12        | Y    | GAVTENRT               |                  |       |           |      |             |  |
| TH966.8         | Y | ANNSTN    | SSI196.01   | Y | NNTTNGTQT | DU172.17        | Y    | KEKNDT                 |                  |       |           |      |             |  |

The V5 loop sequence motifs for the CAP257 transmitted/founder clone, and the 196 heterologous strain from supplementary table 1 are shown. Potential N-linked glycosylation sequons are highlighted in red. The presence or absence of the N276 glycan for each virus is indicated.
